# Supplementary material for: Paracyclophanes as model compounds for strongly interacting π-systems. Part 2: mono-hydroxy[2.2]paracyclophane
Source: Royal Society of Chemistry journal article supplement (doi:10.1039/c0cp02841j), 2011-01-01
Supplement: c0cp02841j.pdf [file c0cp02841j.pdf]

## Supplementary Information

### Paracyclophanes as Model Compounds for Strongly Interacting $\pi$ -Systems, Part 2: *Mono*-hydroxy[2.2]paracyclophane

Christof Schon, Wolfgang Roth, Ingo Fischer

Johannes Pfister, Reinhold F. Fink, and Bernd Engels

*Institut für Physikalische & Theoretische Chemie, Universität Würzburg,*

*Am Hubland, D-97074 Würzburg, Germany*

*E-mail:* [ingo.fischer@uni-wuerzburg.de](mailto:ingo.fischer@uni-wuerzburg.de), [reinhold.fink@uni-wuerzburg.de](mailto:reinhold.fink@uni-wuerzburg.de)

The supporting information contains a comparison of the excited state twist potential computed at different levels, mass spectrum, solution phase UV/Vis spectra, a hole burning spectrum (SHB), a list of peaks observed in the REMPI spectra and Cartesian coordinates of the most important stationary points of the computations.

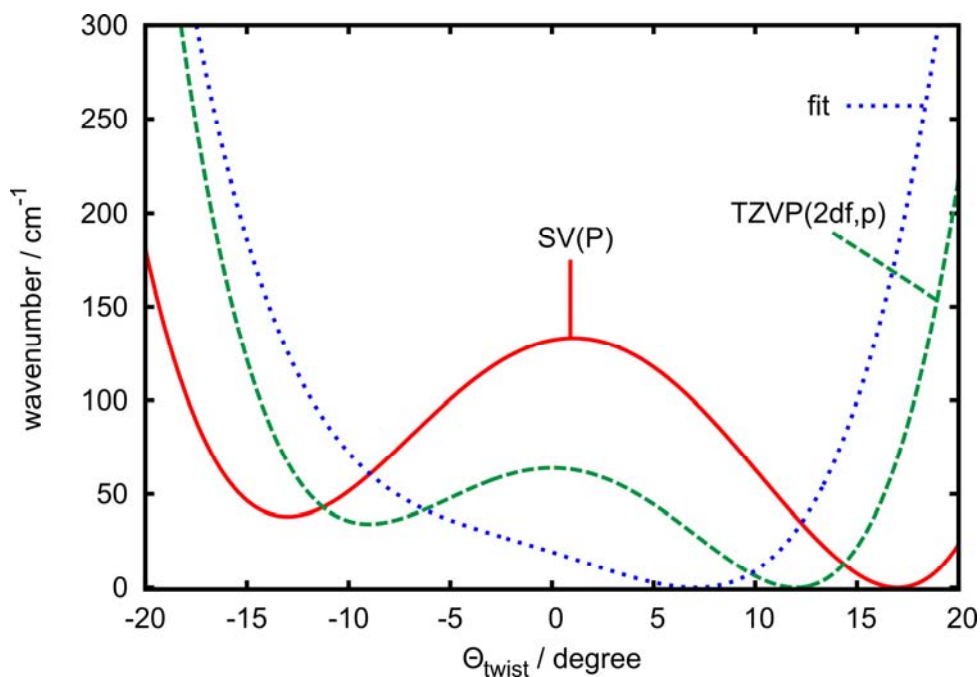

**Figure S1:** The potential energy curves of the excited state of MHPC as a function of the twist coordinate at different levels of theory. The SV(P) [TZV(2df,p)] curve is the curve, obtained by optimizing the structure of the molecule for given  $\theta_{\text{twist}}$  values at the SCS-CC2/SV(P) [SCS-CC2/TZV(2df,p)] level. The fitted curve is a fourth order polynomial that provides relative term energies and intensities fitting best to the corresponding experimental values.

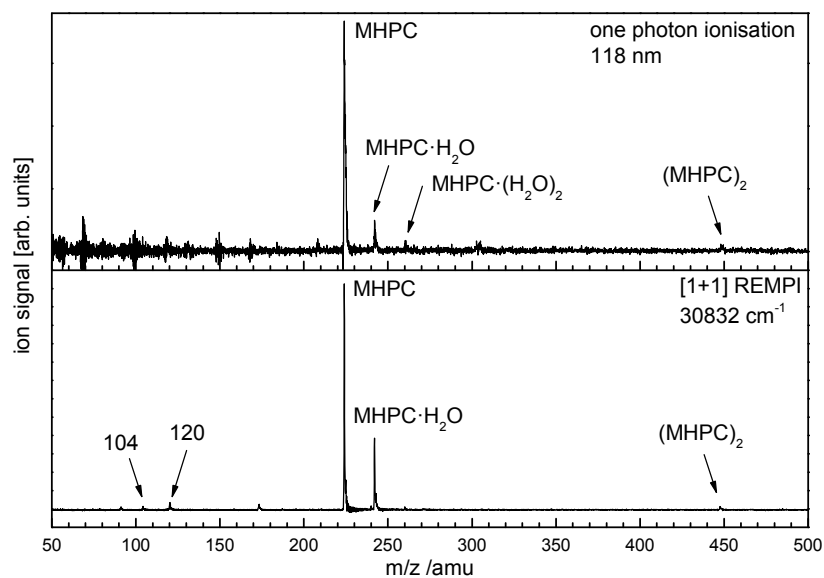

**Figure S2:** Mass spectra of MHPC using one-photon ionisation at 118 nm (upper trace) and [1+1] ionisation through the  $T^3$  band (lower trace). The mass spectrum at 118 nm was obtained by focusing the third harmonic of a Nd:YAG laser at 355 nm into a cell filled with 23 mbar of xenon. The VUV light was focused into the ionisation region by a 100 mm  $MgF_2$  lens mounted at the exit of the cell. A small signal due water clusters is visible, but no significant fragmentation of MHPC is evident. The signals at  $m/z = 104$  and  $m/z = 120$  originate from dissociative photoionization of the unsymmetric cyclophane and correspond to substituted benzene ( $\cdot CH_2-C_6H_4-CH_2\cdot$ ) and phenol ( $\cdot CH_2-C_6H_3OH-CH_2\cdot$ ) subunits. Their low intensity indicates that higher order photon processes are not important.

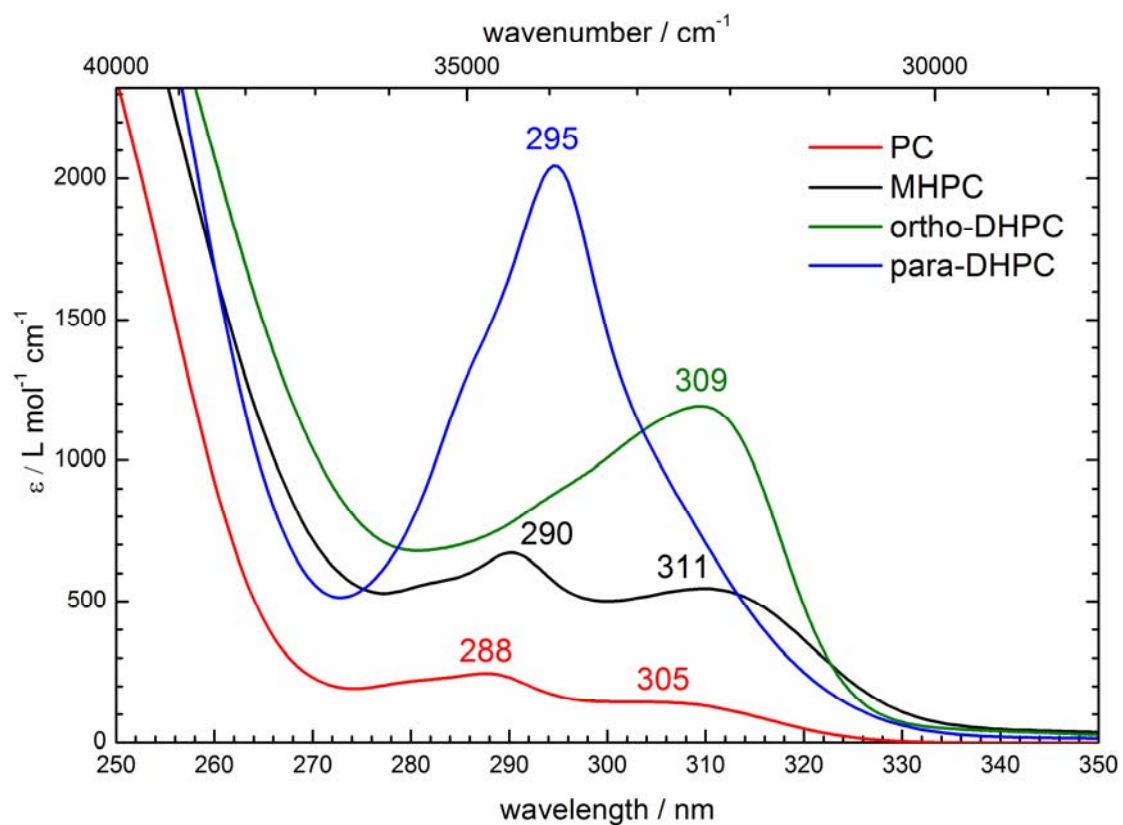

**Figure S3:** UV/Vis spectra of hydroxyl-substituted [2.2]paracyclophanes, recorded in  $\text{CH}_2\text{Cl}_2$ . As visible the onset of the spectrum as well as the absorption maximum depend strongly on the substitution pattern.

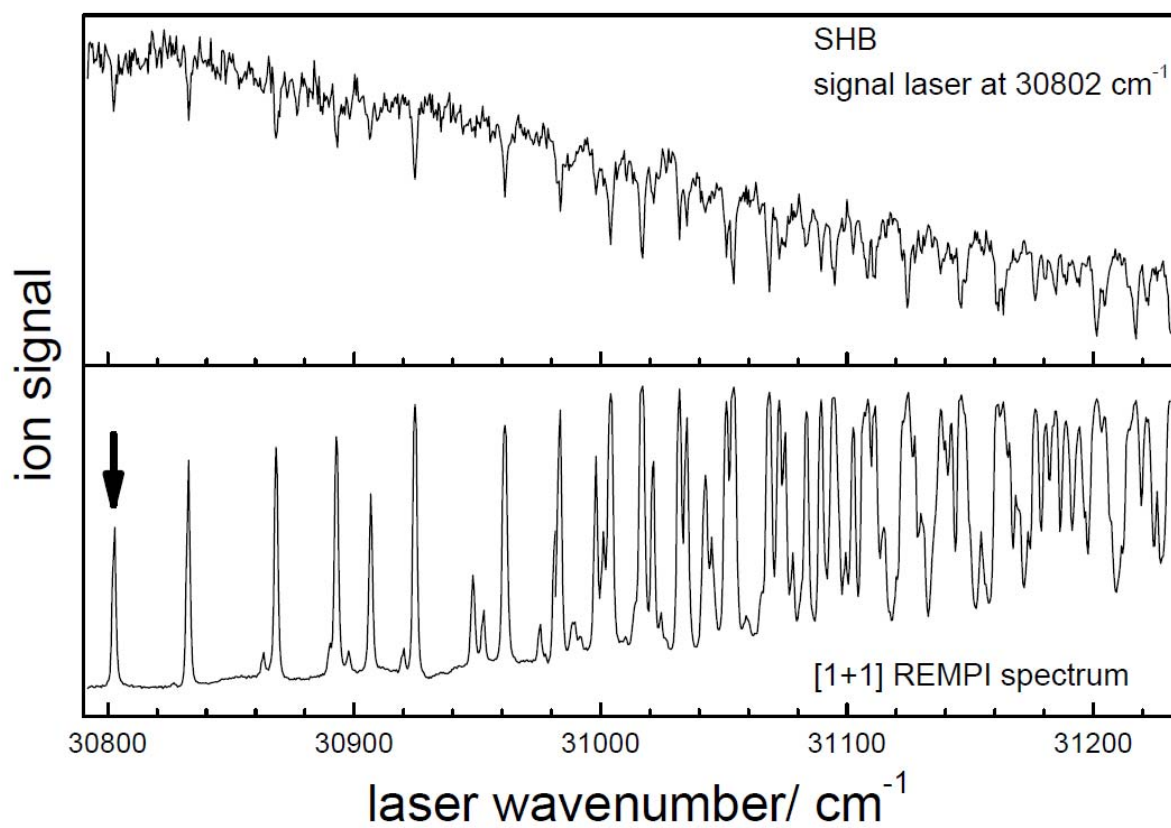

**Figure S4:** SHB-spectrum of MHPc. The signal laser was set on the peak marked with an arrow, assigned to the twist mode fundamental in the excited state. As visible, the most intense peaks originate all from the same isomer.

**Table S1:** Parameters for the calculated and fitted one dimensional potential energy curve of the electronically excited state of MHPC as a function of  $\theta_{\text{twist}}$ .  $\theta_1$  and  $\theta_2$  represent the local minima of the potential energy curves,  $E_0$  is the energy at  $\theta_{\text{twist}}=0^\circ$ , while  $E_2$  is the energy at  $\theta_2$ . The potential energy is represented by a fourth order polynomial of  $\theta_{\text{twist}}$  with the expansion coefficients  $a_0$  to  $a_4$ .

|                           | SV(P)       | TZV(2df,p) | fit        |
|---------------------------|-------------|------------|------------|
| $\theta_1$ (degree)       | 16          | 11         | 7.1        |
| $\theta_2$ (degree)       | -13         | -10        | -          |
| $E_0$ (cm <sup>-1</sup> ) | 132         | 64         | 19.0       |
| $E_2$ (cm <sup>-1</sup> ) | 38          | 34         | -          |
| $a_0$                     | 132         | 64         | 19.0       |
| $a_1$                     | 2.087534    | -1.59058   | -3.391260  |
| $a_2$                     | -0.969547   | -0.840616  | -0.050240  |
| $a_3$                     | -0.01507549 | -0.0002282 | 0.00229112 |
| $a_4$                     | 0.00223629  | 0.00378674 | 0.00266640 |

**Table S2:** Term wavenumbers of the excited state with respect to the  $v'=0$  level, where  $v'$  represents the quantum number of the twist vibration, and intensities of the transitions to these states from the ground state. Results from the calculated potential energy curves at the SCS-CC2/SV(P) and SCS-CC2/TZV(2df,p) level are compared with those of the fitted potential energy curve and the corresponding experimental values. The standard deviation of the difference between the calculated and experimental wavenumbers,  $\sigma$ , is also shown.

| $v$      | wavenumber (cm <sup>-1</sup> ) |            |       |       | Intensity (%) |            |      |      |
|----------|--------------------------------|------------|-------|-------|---------------|------------|------|------|
|          | SV(P)                          | TZV(2df,p) | fit   | expt. | SV(P)         | TZV(2df,p) | fit  | expt |
| 0        | 0                              | 0          | 0.0   | 0     | 0             | 0          | 1.4  | 2    |
| 1        | 36                             | 28         | 29.8  | 30    | 88            | 80         | 16.4 | 20   |
| 2        | 57                             | 46         | 60.4  | 60    | 0             | 13         | 33.4 | 31   |
| 3        | 86                             | 73         | 95.5  | 96    | 10            | 5          | 29.1 | 23   |
| 4        | 103                            | 104        | 134.2 | 134   | 1             | 0          | 14.8 | 16   |
| 5        | 126                            | 141        | 176.0 | 176   | 1             | 0          | 4.8  | 8    |
| $\sigma$ | 26.8                           | 23.9       | 0.3   |       |               |            |      |      |

**Table S3:** List of all peaks observed in the REMPI spectra of MHPC

| Absolute band position / $\text{cm}^{-1}$ | Relative band position / $\text{cm}^{-1}$ | Intensity | Assignment |
|-------------------------------------------|-------------------------------------------|-----------|------------|
| 30772                                     |                                           | w         | $0_0^0$    |
| 30802                                     | 30                                        | s         | T          |
| 30832                                     | 60                                        | s         | $T^2$      |
| 30863                                     | 91                                        | w         | S          |
| 30868                                     | 96                                        | s         | $T^3$      |
| 30893                                     | 121                                       | s         | ST         |
| 30906                                     | 134                                       | m         | $T^4$      |
| 30920                                     | 148                                       | w         |            |
| 30924                                     | 152                                       | s         | $ST^2$     |
| 30948                                     | 176                                       | m         | $T^5$      |
| 30952                                     | 180                                       | w         | $S^2$      |
| 30961                                     | 189                                       | s         | $ST^3$     |
| 30975                                     | 203                                       | w         | B          |
| 30981                                     | 209                                       | m         |            |
| 30983                                     | 211                                       | s         | $S^2T$     |
| 30998                                     | 226                                       | m         | $ST^4$     |
| 31001                                     | 229                                       | w         |            |
| 31004                                     | 232                                       | s         | BT         |
| 31016                                     | 244                                       | s         | $S^2T^2$   |
| 31021                                     | 249                                       | m         |            |
| 31032                                     | 260                                       | s         |            |
| 31035                                     | 263                                       | m         | $BT^2$     |
| 31043                                     | 271                                       | W         |            |
| 31045                                     | 273                                       | w         |            |
| 31051                                     | 279                                       | m         |            |
| 31054                                     | 282                                       | s         | $S^2T^3$   |
| 31060                                     | 288                                       | w         | BS         |
| 31068                                     | 296                                       | s         | $BT^3$     |
| 31072                                     | 300                                       | m         |            |
| 31075                                     | 303                                       | m         |            |
| 31083                                     | 311                                       | m         |            |
| 31089                                     | 317                                       | m         |            |
| 31094                                     | 322                                       | s         | BST        |
| 31102                                     | 330                                       | m         |            |
| 31108                                     | 336                                       | s         | $BT^4$     |
| 31111                                     | 339                                       | s         |            |
| 31115                                     | 343                                       | w         |            |
| 31124                                     | 352                                       | s         | $BST^2$    |
| 31130                                     | 358                                       | w         |            |
| 31138                                     | 366                                       | m         |            |
| 31146                                     | 374                                       | s         | $BT^5$     |
| 31161                                     | 389                                       | s         | $BST^3$    |

|       |     |   |           |
|-------|-----|---|-----------|
| 31163 | 391 | s |           |
| 31169 | 397 | w | $B^2$     |
| 31176 | 404 | s |           |
| 31180 | 408 | m |           |
| 31184 | 412 | m |           |
| 31188 | 416 | w |           |
| 31194 | 422 | w |           |
| 31201 | 429 | s | $B^2T$    |
| 31204 | 432 | m |           |
| 31216 | 444 | s |           |
| 31221 | 449 | m |           |
| 31231 | 459 | m | $B^2T^2$  |
| 31237 | 465 | w |           |
| 31243 | 471 | w |           |
| 31245 | 473 | w |           |
| 31253 | 481 | s |           |
| 31258 | 486 | m |           |
| 31262 | 490 | w | $B^2S$    |
| 31267 | 495 | m | $B^2T^3$  |
| 31268 | 496 | m |           |
| 31271 | 499 | m |           |
| 31281 | 509 | m |           |
| 31285 | 513 | w |           |
| 31291 | 519 | w | $B^2ST$   |
| 31294 | 522 | w |           |
| 31301 | 529 | w |           |
| 31304 | 532 | m | $B^2T^4$  |
| 31308 | 536 | s |           |
| 31311 | 539 | m |           |
| 31319 | 547 | m |           |
| 31322 | 550 | s | $B^2ST^2$ |
| 31326 | 554 | w |           |
| 31333 | 561 | w |           |
| 31337 | 565 | m |           |
| 31346 | 574 | m | $B^2T^5$  |
| 31349 | 577 | w |           |
| 31352 | 580 | w |           |
| 31361 | 589 | s | $B^2ST^3$ |
| 31363 | 591 | s |           |
| 31369 | 597 | w | $B^3$     |
| 31374 | 602 | m |           |
| 31378 | 606 | w |           |
| 31383 | 611 | m |           |
| 31388 | 616 | m |           |
| 31400 | 628 | m | $B^3T$    |
| 31415 | 643 | s |           |

|       |     |   |           |
|-------|-----|---|-----------|
| 31430 | 658 | s | $B^3T^2$  |
| 31438 | 666 | w |           |
| 31441 | 669 | w |           |
| 31443 | 671 | w |           |
| 31453 | 681 | s |           |
| 31460 | 688 | w | $B^3S$    |
| 31466 | 694 | m | $B^3T^3$  |
| 31470 | 698 | s |           |
| 31482 | 710 | w |           |
| 31485 | 713 | m |           |
| 31491 | 719 | s | $B^3ST$   |
| 31493 | 721 | m |           |
| 31506 | 734 | m | $B^3T^4$  |
| 31521 | 749 | s | $B^3ST^2$ |
| 31535 | 763 | m |           |
| 31545 | 773 | m |           |
| 31549 | 777 | m | $B^3T^5$  |
| 31562 | 790 | s | $B^3ST^3$ |
| 31588 | 816 | m |           |
| 31591 | 819 | m |           |
| 31599 | 827 | m |           |



**Table S4:** Cartesian coordinates (x, y, z) for the most important points. These points are a) the ground state minimum energy structure and b) the two minima and the maximum along the twist coordinate in the electronically excited state. The data given in figures 2 and 3 as well as tables 1 and of the main paper were computed using the TZV(2df,p) basis set. For computations of zero point vibrational energies the SV(P) basis set was used.

Ground state (global minimum), SCS-MP2, TZV(2df,p) basis set

|                   |                   |                   |   |
|-------------------|-------------------|-------------------|---|
| 2.41605499975078  | -1.47439549229383 | -1.65117714365664 | c |
| 2.11107321529098  | 0.97632269579099  | -2.58956692089128 | c |
| 2.65463481421225  | 2.95743966584108  | -0.93157568559473 | c |
| 2.95653515146017  | 2.54754115558829  | 1.65516172779681  | c |
| 2.72001400312869  | 0.10808910027957  | 2.63511026776604  | c |
| 2.69866857343568  | -1.90121749069439 | 0.92341710367751  | c |
| 0.71321838466997  | 1.38496218688493  | -5.03886275006491 | c |
| -2.12637294149195 | 0.43846914772197  | -4.87151018309160 | c |
| -2.98933694205179 | 0.21377154675394  | -2.16310972853298 | c |
| -3.08727788786271 | 2.35980064235329  | -0.62626662353772 | c |
| -2.81194050575391 | 2.15369166900314  | 1.97746958817609  | c |
| -2.45531953478362 | -0.20354159813463 | 3.11836890353271  | c |
| -2.93338377085634 | -2.34526691826350 | 1.64385165792214  | c |
| -3.19852076475397 | -2.13793171703583 | -0.97113636604743 | c |
| -1.10479440343999 | -0.35526383035800 | 5.61926964389436  | c |
| 1.89900821828433  | -0.37939671117137 | 5.31634865751486  | c |
| 2.07640891095543  | -3.41583807817604 | -3.33227778992529 | o |
| 2.55672330948704  | 4.88418100251107  | -1.63354757590801 | h |
| -3.09372462240170 | 4.22329127823162  | -1.48915978588643 | h |
| 2.60156010896288  | -3.82982937448532 | 1.62996089932109  | h |
| -3.30926106894721 | -3.83874054822732 | -2.11389036951479 | h |
| -2.85511215011059 | -4.20852785623572 | 2.50528164823533  | h |
| 3.10525207304922  | 4.15216003559363  | 2.92509453342935  | h |
| 2.69597885449077  | 1.03323043094897  | 6.59520245734568  | h |
| 2.59718737082326  | -2.22392117012239 | 5.93220083484520  | h |
| -2.62463550541380 | 3.85785077765518  | 3.10597681421946  | h |
| -3.30273234535951 | 1.76103216231317  | -5.94008503507723 | h |
| -2.27076144381463 | -1.40515628788012 | -5.78574835845340 | h |
| -1.66931673509513 | -2.04907423450025 | 6.65927449332832  | h |
| -1.62094749071982 | 1.27461364110166  | 6.77863529533799  | h |
| 0.72342562136644  | 3.40783138412679  | -5.45756319370445 | h |
| 1.62292470055730  | 0.41866536826484  | -6.62094808667593 | h |
| 2.12497721949505  | -4.99121788235027 | -2.40817526668428 | h |

Ground state, SCS-CC2, SV(P) basis set

|                  |                   |                   |   |
|------------------|-------------------|-------------------|---|
| 2.25457780894598 | -1.66924327350980 | -1.60377790726541 | c |
| 2.22483209369380 | 0.80424522580629  | -2.59156899945472 | c |
| 2.96112974380445 | 2.75591896330621  | -0.95062349611536 | c |
| 3.20095533676926 | 2.35528288633418  | 1.66424227251591  | c |
| 2.70227104469129 | -0.04574711492491 | 2.68570644824410  | c |
| 2.48044070634151 | -2.08587793853257 | 0.99608493342504  | c |
| 0.89228900054093 | 1.28154109630491  | -5.07597476956030 | c |

|                   |                   |                   |   |
|-------------------|-------------------|-------------------|---|
| -2.02282753138768 | 0.59133423614881  | -4.92917024686286 | c |
| -2.92832026659256 | 0.43678274001852  | -2.21831082848178 | c |
| -2.80818934532140 | 2.59182338470895  | -0.66400989497213 | c |
| -2.58132053349006 | 2.35412162896555  | 1.95720933428995  | c |
| -2.49862148450192 | -0.04481317135464 | 3.10499734990126  | c |
| -3.18592016806519 | -2.13345895762894 | 1.60593547077693  | c |
| -3.40795533882676 | -1.89551915550346 | -1.02812686660133 | c |
| -1.19008259369259 | -0.34801442208575 | 5.62716983733726  | c |
| 1.82093056815648  | -0.40357335356482 | 5.37986623436015  | c |
| 1.72083120337703  | -3.57924326471155 | -3.26361925884520 | o |
| 3.07117139942443  | 4.69479031510999  | -1.68979405473316 | h |
| -2.60563341822778 | 4.46883119226162  | -1.53146957788576 | h |
| 2.17929789338270  | -4.00438414092048 | 1.73968714481313  | h |
| -3.69107244376761 | -3.59395868555898 | -2.18865516378220 | h |
| -3.31791247827080 | -4.01761646515995 | 2.47479425512001  | h |
| 3.50223268934840  | 3.97638892545390  | 2.92626237060855  | h |
| 2.62919918535382  | 1.08863596137048  | 6.60002472587989  | h |
| 2.51647370918179  | -2.23133928674186 | 6.12007264628918  | h |
| -2.22547483006045 | 4.04836282464570  | 3.10448811809053  | h |
| -3.09783593328615 | 2.02222853637635  | -6.01442172533552 | h |
| -2.33381969325500 | -1.25165056193205 | -5.85769182273177 | h |
| -1.82554625880622 | -2.10875363139171 | 6.55879149805613  | h |
| -1.72059326902737 | 1.22967708303060  | 6.89213063771098  | h |
| 1.09659896861322  | 3.30816052132768  | -5.54759531262716 | h |
| 1.75587944625453  | 0.19434753347376  | -6.63800261449063 | h |
| 1.60736018577127  | -5.16745371993626 | -2.32942270974180 | h |

Excited state 1 (local minimum,  $\theta_{\text{twist}} = -10^\circ$ ), SCS-CC2, TZV(2df,p)

|                   |                   |                   |   |
|-------------------|-------------------|-------------------|---|
| 2.40742179444909  | -1.63421045539069 | -1.67892479561058 | c |
| 1.94960672855365  | 0.82145130548223  | -2.63398221120769 | c |
| 2.28865694613203  | 2.88126774388242  | -0.95608205967967 | c |
| 2.50075485474779  | 2.43354914974865  | 1.66128879196947  | c |
| 2.51332597562381  | -0.06152873653738 | 2.63922646410410  | c |
| 2.74152977608787  | -2.09483868683722 | 0.93511596984446  | c |
| 0.70726945647638  | 1.22351514719546  | -5.16599578611488 | c |
| -2.19178774447416 | 0.63823098722232  | -4.90985255280209 | c |
| -2.84730974908819 | 0.41033014675742  | -2.14315580370651 | c |
| -3.08298567039155 | 2.57624338269988  | -0.59704948814208 | c |
| -2.76631397991977 | 2.32874844718679  | 2.03178899766879  | c |
| -2.32438682442425 | -0.04890341580632 | 3.15844450733725  | c |
| -2.64527778600250 | -2.23957649386901 | 1.66413907145205  | c |
| -2.85973733617829 | -1.98638278836523 | -0.97066714950182 | c |
| -1.09212881687329 | -0.22526644298261 | 5.72140393992336  | c |
| 1.84219417672806  | -0.55348271340716 | 5.36491243073271  | c |
| 2.35924432892203  | -3.57217547359228 | -3.38178751075083 | o |
| 2.16336312431363  | 4.79711974438213  | -1.67306891062177 | h |
| -3.30114296295842 | 4.43212555950313  | -1.44349272901703 | h |
| 2.92079448803015  | -4.02093715235009 | 1.62521797434096  | h |
| -2.86230550694063 | -3.66317339749207 | -2.15637454033441 | h |
| -2.53050624013402 | -4.09957792393034 | 2.52343198757590  | h |
| 2.53828632154399  | 4.01506268779808  | 2.97042863031584  | h |

|                   |                   |                   |   |
|-------------------|-------------------|-------------------|---|
| 2.84862527951025  | 0.74396912155672  | 6.62443713512667  | h |
| 2.41011678963496  | -2.47466344424140 | 5.87805512668651  | h |
| -2.72694564439493 | 4.00938676643380  | 3.21268899064412  | h |
| -3.30354972806693 | 2.12334220645559  | -5.82922905812276 | h |
| -2.61750203323926 | -1.14406598214153 | -5.86604104866566 | h |
| -1.85620903194758 | -1.80895955657026 | 6.81494426299947  | h |
| -1.46725744554464 | 1.50454882156338  | 6.79039192967790  | h |
| 0.98748026545603  | 3.19341540002526  | -5.72698014767284 | h |
| 1.54356078641133  | 0.03010240979397  | -6.62987420226122 | h |
| 2.57332282452052  | -5.14104166313857 | -2.45733455309196 | h |

Excited state 2 (global minimum,  $\theta_{\text{twist}} = +11^\circ$ ), SCS-CC2, TZV(2df,p)

|                   |                   |                   |   |
|-------------------|-------------------|-------------------|---|
| -0.83406085681275 | 5.24513563514652  | -0.53062031864460 | c |
| -2.02580662521018 | 2.67638046320201  | -0.23845300914424 | c |
| -2.20691713303977 | 1.46451238985649  | 2.14973806588154  | c |
| -2.66170354159879 | 1.21632386047087  | -2.40691412740050 | c |
| -2.47529538088191 | -1.18943824014331 | 2.38417187055402  | c |
| -2.79310765762682 | -1.43410975214400 | -2.19650080215593 | c |
| -2.46975821966851 | -2.67143824932265 | 0.16509859185419  | c |
| -1.69657321230204 | -5.40823616821238 | 0.25559547042162  | c |
| 1.97057564503301  | 4.92009098509368  | -1.45869331831096 | c |
| 2.73585269348060  | 2.19747366185951  | -1.08136934055398 | c |
| 3.04791432813678  | 1.23165274295429  | 1.37816067739019  | c |
| 2.68111318248174  | 0.49018066139827  | -3.11569233258408 | c |
| 2.95087959958933  | -1.38222943817655 | 1.85544094705903  | c |
| 2.44816507509112  | -2.11504100094717 | -2.62978904900526 | c |
| 2.39458437197584  | -3.05122532440848 | -0.13847160526495 | c |
| 1.26831873745206  | -5.60695265086050 | 0.43266807911626  | c |
| -1.92476123968725 | 2.93967838788487  | 4.24207803081830  | o |
| -1.94631143911116 | 1.83893564679541  | 5.70913266656298  | h |
| -2.81543938596514 | 2.12828236388176  | -4.23636673418900 | h |
| -2.47092756237242 | -2.06964281787694 | 4.24033931715209  | h |
| -3.02554584504952 | -2.58110069845048 | -3.88388101204306 | h |
| -0.86134367662873 | 6.24093788856145  | 1.27506979103521  | h |
| -1.90192318313125 | 6.38811112281631  | -1.88830964797427 | h |
| -2.56840623522514 | -6.37757704635326 | 1.86538165136654  | h |
| -2.34542964640565 | -6.35678682908782 | -1.46347160274847 | h |
| 3.20368224704176  | 6.21089666607568  | -0.41267262956592 | h |
| 2.12172676626349  | 5.40531515533765  | -3.46219620413725 | h |
| 1.82711379614598  | -6.19806018380193 | 2.33355179054366  | h |
| 1.94493270224207  | -7.04815400399648 | -0.88836507631210 | h |
| 3.21193941548579  | 2.54554434596479  | 2.94877547585680  | h |
| 2.58022269518926  | 1.18964353217275  | -5.04100491495606 | h |
| 3.07866214056971  | -2.08719156233473 | 3.77769614871040  | h |
| 2.18178840083967  | -3.42156430593215 | -4.19338202431430 | h |

Excited state ( $\theta_{\text{twist}} = 0^\circ$ ), SCS-CC2, TZV(2df,p)

|                   |                  |                  |   |
|-------------------|------------------|------------------|---|
| -1.17649534210604 | 5.22452658600047 | 0.16122573494133 | c |
| -1.39861363052699 | 2.69409597873468 | 1.44763942080262 | c |
| 0.61703814577330  | 1.65887566536595 | 2.87567552476823 | c |

|                   |                   |                   |   |
|-------------------|-------------------|-------------------|---|
| -3.49437231389494 | 1.09726982005453  | 0.93950369893726  | c |
| 0.79991492277024  | -0.96319774252101 | 3.37515428791191  | c |
| -3.27095733418332 | -1.52851836756321 | 1.32175979102360  | c |
| -1.03285584460787 | -2.59822745108054 | 2.34071762498246  | c |
| -0.43145726294784 | -5.35049792474601 | 1.92973190838201  | c |
| 0.05258172281808  | 4.85428228067171  | -2.52432405674383 | c |
| 0.62562213618917  | 2.08709187639224  | -2.90576104726670 | c |
| 2.85631913644682  | 1.03637911811845  | -1.89540347289766 | c |
| -1.21561752171765 | 0.43701984469858  | -3.90105577866229 | c |
| 3.09651126279201  | -1.58121666340866 | -1.50459753707762 | c |
| -1.02724644171320 | -2.17043302446997 | -3.40987735371915 | c |
| 1.02372107888619  | -3.17336546338684 | -2.03440551613837 | c |
| 0.81011234779263  | -5.71042268750436 | -0.75539652097043 | c |
| 2.47336207583837  | 3.28212773321250  | 3.62948138013547  | o |
| 3.77400735829604  | 2.29802760526625  | 4.46738239368863  | h |
| -5.17535677420954 | 1.88282676075765  | 0.06860054957252  | h |
| 2.44631162993116  | -1.71537425244897 | 4.34625998638311  | h |
| -4.78689903748408 | -2.78110721937352 | 0.73088246072275  | h |
| -0.02929029340834 | 6.51856844283704  | 1.28677491075159  | h |
| -3.05940847143472 | 6.06055625152907  | -0.02696431336115 | h |
| 0.85231229169536  | -6.02656189335897 | 3.40508022481165  | h |
| -2.15897346498914 | -6.48187029806441 | 2.05003032460604  | h |
| 1.78755592573360  | 5.97215940451134  | -2.65161864598291 | h |
| -1.23183598962199 | 5.53156059174824  | -3.99747693826735 | h |
| 2.67799870884648  | -6.57967645800165 | -0.56401292535805 | h |
| -0.35438542256870 | -6.98969966246198 | -1.88852549879641 | h |
| 4.34858864529125  | 2.30070154115159  | -1.26847436249949 | h |
| -2.86483634483766 | 1.19112868716206  | -4.85945741251434 | h |
| 4.78306866430739  | -2.34854522042048 | -0.62347176544346 | h |
| -2.54409292249092 | -3.42764148026191 | -3.99292165874652 | h |

Excited state 1 (local minimum,  $\theta_{\text{twist}} = -10^\circ$ ), SCS-CC2, SV(P)

|                   |                   |                   |   |
|-------------------|-------------------|-------------------|---|
| 2.73199772400946  | -0.74147455740904 | -1.79934335838902 | c |
| 1.51460089125543  | 1.48283091419301  | -2.69552597390379 | c |
| 1.21073697992987  | 3.51385770596907  | -0.95416751815156 | c |
| 1.67550585073822  | 3.13264452377789  | 1.65771857469614  | c |
| 2.49656251169213  | 0.73828707300904  | 2.58019215707444  | c |
| 3.31933987664858  | -1.09408717640264 | 0.80300294131970  | c |
| 0.08600211300693  | 1.45218946023136  | -5.17151692774696 | c |
| -2.36902618648819 | -0.18456500474596 | -4.85873061157957 | c |
| -2.87734158722432 | -0.59559964172597 | -2.07158136226474 | c |
| -3.77983119839226 | 1.40271810584105  | -0.52124122433296 | c |
| -3.34022678381189 | 1.31672610444545  | 2.11234218245980  | c |
| -2.12801656879612 | -0.78376230562479 | 3.25708804205226  | c |
| -1.73792526660336 | -2.98279933577153 | 1.76766025070939  | c |
| -2.10696828687771 | -2.86880934538861 | -0.87282015349647 | c |
| -0.80685723469969 | -0.49912762654571 | 5.77806341879160  | c |
| 2.08395295778831  | 0.00884496478856  | 5.31551151514674  | c |
| 3.22607147551910  | -2.56611771954589 | -3.55015036502345 | o |
| 0.47439159078653  | 5.33215170382029  | -1.62753810993849 | h |
| -4.61608172747785 | 3.09616798848377  | -1.38223448983772 | h |

|                   |                   |                   |   |
|-------------------|-------------------|-------------------|---|
| 4.13435512951165  | -2.89330777480831 | 1.44582654994372  | h |
| -1.58716064252575 | -4.49724148691631 | -2.05180330200089 | h |
| -1.01338847756250 | -4.71880349603802 | 2.64731768834153  | h |
| 1.25096082124100  | 4.64951648581671  | 3.01154330682884  | h |
| 2.76838475724930  | 1.50556420352170  | 6.61062749617591  | h |
| 3.19332666789501  | -1.71241699155669 | 5.74121607664326  | h |
| -3.84062836212003 | 2.95547099139332  | 3.28771559305895  | h |
| -3.99222892165811 | 0.74336403037841  | -5.80443172034517 | h |
| -2.09248589356324 | -2.03723621885023 | -5.78466742136749 | h |
| -1.06515508462141 | -2.20034971442428 | 6.97365401805926  | h |
| -1.64675264866042 | 1.10902334978008  | 6.81853589480827  | h |
| -0.41926400139861 | 3.42039969986395  | -5.66384673697101 | h |
| 1.26059661743838  | 0.70520214273666  | -6.73057284277301 | h |
| 3.97638081674729  | -4.02384493831666 | -2.69734004395382 | h |

Excited state 2 (global minimum,  $\theta_{\text{twist}} = +11^\circ$ ), SCS-CC2, SV(P)

|                   |                   |                   |   |
|-------------------|-------------------|-------------------|---|
| -0.20796522066982 | 5.26629451812537  | -0.79190569804725 | c |
| -1.50017993361240 | 2.77091810142853  | -1.29920920294440 | c |
| -3.01094801374131 | 1.55125309629794  | 0.58250298716420  | c |
| -0.88151975833372 | 1.31959777276668  | -3.50117979640216 | c |
| -3.44831551244423 | -1.11191678003590 | 0.57249148456118  | c |
| -1.15892630822980 | -1.34543813747353 | -3.43675506504659 | c |
| -2.23489602533550 | -2.61112103721142 | -1.30252156382596 | c |
| -1.66842075221104 | -5.36649416355034 | -0.81465873173680 | c |
| 2.67014183530865  | 4.81201136141988  | -0.21893176684136 | c |
| 3.01886029590957  | 2.08306612911363  | 0.57384784350190  | c |
| 1.87143433433364  | 1.19604624753561  | 2.81617027414801  | c |
| 4.01300272045025  | 0.28808626216733  | -1.12917906743164 | c |
| 1.39334716069838  | -1.40245301858213 | 3.18686792839333  | c |
| 3.45095515212551  | -2.30218446737670 | -0.80668725819464 | c |
| 1.98243955730077  | -3.14932179319477 | 1.25693584392680  | c |
| 0.57821067959228  | -5.63764601101580 | 1.11763585193690  | c |
| -3.88465196772002 | 3.01128061459982  | 2.50803700728856  | o |
| -4.75939883916978 | 1.92677876981114  | 3.72408872180625  | h |
| 0.00884292132121  | 2.24458870186120  | -5.13078682943421 | h |
| -4.57136753663248 | -1.99517344150700 | 2.08189778367123  | h |
| -0.43692646947935 | -2.49025723447110 | -5.01306268264961 | h |
| -1.11801774529107 | 6.19099230103843  | 0.84086010795333  | h |
| -0.41999531226291 | 6.56156227438168  | -2.42665422257897 | h |
| -3.36085053547384 | -6.37146424011475 | -0.09211189542122 | h |
| -1.14500588994770 | -6.28126950757119 | -2.62130845738870 | h |
| 3.32589978776132  | 6.14605863333733  | 1.25593517890858  | h |
| 3.81585030676385  | 5.18225359337662  | -1.92796504230377 | h |
| -0.15866705510562 | -6.12098166497426 | 3.01395637818062  | h |
| 1.83382529961912  | -7.20741546977760 | 0.53326170739391  | h |
| 1.18339633676290  | 2.56938114955651  | 4.21395095630551  | h |
| 5.02858363145813  | 0.91985588200055  | -2.82491657657205 | h |
| 0.38591775627817  | -2.03965692803973 | 4.88600851136427  | h |
| 4.04991583681620  | -3.66641824426513 | -2.25582111014700 | h |
